# Supplementary material for: Reevaluation of Piezo1 as a gut RNA sensor
Source: eLife. 2022 Nov 16;11:e83346. doi: 10.7554/eLife.83346 (PMC9691018; doi:10.7554/eLife.83346)
Supplement: Supplementary file 1. — A list of all gene transcripts detected in RIN14B cells and their prevalence in the cell population with a weak cutoff limit. [file elife-83346-supp1.xlsx]

## Sheet: RIN14B snRNA-seq
Genes	% cells expressing
AC134224	100
5-8S-rRNA	36.7
5-8S-rRNA8	11.2
5S-rRNA47	13.8
5S-rRNA64	10.6
5S-rRNA0	8
5S-rRNA4	11.5
5S-rRNA	10.6
7SK29	8.9
7SK53	17.2
7SK88	7.7
7SK03	12
7SK57	10.6
7SK79	9.2
7SK98	8.3
A1cf	65.6
A3galt2	10.9
Aaas	29.5
AABR07000392	9.2
AABR07001068	25.2
AABR07001382	59.9
AABR07001519	65
AABR07002068	17.5
AABR07002674	14.9
AABR07002774	26.4
AABR07002774	9.2
AABR07002945	18.3
AABR07004085	9.7
AABR07004269	8
AABR07004294	13.8
AABR07004891	16
AABR07004996	20.1
AABR07005508	11.2
AABR07005711	14.9
AABR07005752	18.6
AABR07006111	9.5
AABR07006258	12.9
AABR07006458	23.2
AABR07006480	7.7
AABR07006559	12.9
AABR07006894	26.4
AABR07007032	43.8
AABR07010468	22.9
AABR07010777	9.5
AABR07012111	11.2
AABR07012475	10
AABR07012575	20.9
AABR07012775	8.6
AABR07013073	10.3
AABR07013154	7.4
AABR07013208	12.6
AABR07013918	9.5
AABR07014547	15.8
AABR07014739	26.6
AABR07015064	36.1
AABR07015507	10.3
AABR07015831	24.9
AABR07015855	11.5
AABR07015907	12.9
AABR07016578	7.7
AABR07016873	8.3
AABR07017145	24.4
AABR07017236	18.1
AABR07018038	22.3
AABR07019086	12
AABR07020663	12.6
AABR07020987	9.5
AABR07021536	14.9
AABR07021704	21.8
AABR07021812	19.5
AABR07021988	22.3
AABR07024442	21.5
AABR07024593	10.6
AABR07024833	8.9
AABR07024869	8.6
AABR07025048	13.5
AABR07025295	18.1
AABR07026291	64.8
AABR07026536	11.2
AABR07026557	11.2
AABR07026557	10.9
AABR07026565	7.4
AABR07026893	13.2
AABR07027212	8.6
AABR07027263	13.2
AABR07027274	14.3
AABR07027306	20.1
AABR07027381	9.5
AABR07027750	34.4
AABR07028615	18.3
AABR07028769	9.2
AABR07028859	19.8
AABR07028902	48.4
AABR07028908	14.9
AABR07029002	10.3
AABR07029272	18.9
AABR07029581	49.6
AABR07029651	10.3
AABR07030086	7.7
AABR07030184	33.5
AABR07030184	8.9
AABR07030377	13.2
AABR07030383	12.9
AABR07030521	24.6
AABR07030781	16.6
AABR07031168	8.3
AABR07031480	22.6
AABR07031494	11.7
AABR07031533	37.8
AABR07031703	44.7
AABR07031756	35
AABR07032135	33.8
AABR07032496	6.9
AABR07032622	48.1
AABR07032623	16.9
AABR07033249	14.9
AABR07033720	11.7
AABR07033887	8
AABR07033979	9.7
AABR07034426	8.3
AABR07034438	23.2
AABR07034463	11.7
AABR07034464	13.2
AABR07034669	10.3
AABR07034767	16.6
AABR07034980	11.2
AABR07035273	28.1
AABR07035309	6.6
AABR07035320	10
AABR07035338	53
AABR07035428	16.6
AABR07035437	40.7
AABR07035456	13.2
AABR07035796	10.6
AABR07035819	10.6
AABR07035839	90.5
AABR07035916	62.5
AABR07036007	22.3
AABR07036010	8.9
AABR07036331	9.5
AABR07036498	11.2
AABR07036498	16.3
AABR07037173	39
AABR07037410	9.5
AABR07037436	47.9
AABR07037451	88.8
AABR07037489	13.8
AABR07037510	10.6
AABR07038021	7.4
AABR07038029	14.3
AABR07038842	16
AABR07038879	14
AABR07039147	8.3
AABR07039210	14.3
AABR07039334	9.5
AABR07040412	22.3
AABR07040729	18.3
AABR07040730	12
AABR07040864	16.3
AABR07040953	8.9
AABR07040963	12.6
AABR07041724	9.2
AABR07042840	9.7
AABR07043031	8
AABR07043098	8.3
AABR07043098	10.3
AABR07043115	9.5
AABR07043748	10.9
AABR07044049	25.5
AABR07044362	10.6
AABR07044364	8.9
AABR07044408	25.5
AABR07044668	63
AABR07044767	18.9
AABR07044900	9.7
AABR07044925	18.3
AABR07044980	24.9
AABR07045105	12.6
AABR07045354	10.9
AABR07045680	8.9
AABR07046707	30.9
AABR07047221	8.3
AABR07047789	18.6
AABR07048397	9.7
AABR07049060	10.6
AABR07049064	10.3
AABR07049156	11.7
AABR07049386	7.4
AABR07049389	9.5
AABR07049695	11.5
AABR07049695	11.7
AABR07049753	13.8
AABR07049760	10
AABR07049792	10
AABR07050134	9.5
AABR07050265	10.9
AABR07050879	12
AABR07051395	10.9
AABR07051450	10
AABR07051804	11.7
AABR07052405	26.9
AABR07052486	8
AABR07052613	7.7
AABR07052697	15.8
AABR07052897	11.2
AABR07052897	26.9
AABR07053185	37.5
AABR07053188	10
AABR07053516	15.5
AABR07053687	19.8
AABR07054315	36.4
AABR07054361	46.4
AABR07054362	42.7
AABR07054370	25.5
AABR07054400	13.5
AABR07054490	18.6
AABR07055288	25.8
AABR07055776	7.2
AABR07056953	24.9
AABR07057617	10.3
AABR07057640	16
AABR07057765	7.7
AABR07058091	30.7
AABR07058158	7.7
AABR07058422	8.9
AABR07058884	8.9
AABR07058884	29.8
AABR07058886	10
AABR07059041	39.3
AABR07059198	30.4
AABR07059258	34.1
AABR07060133	90.3
AABR07060275	16.9
AABR07060291	8.9
AABR07060487	21.2
AABR07060593	9.7
AABR07060620	10.6
AABR07061178	28.4
AABR07061825	8.3
AABR07062583	23.2
AABR07062708	9.2
AABR07062799	18.1
AABR07063281	18.3
AABR07064719	37
AABR07064720	10.3
AABR07064804	22.9
AABR07064873	47.3
AABR07065078	16.3
AABR07065498	10.3
AABR07066144	13.2
AABR07066379	31.5
AABR07066440	18.9
AABR07066522	57.6
AABR07066690	22.1
AABR07066798	11.5
AABR07066816	10.3
AABR07068018	13.8
AABR07068127	14
AABR07068351	8.3
AABR07069466	37
AABR07070312	18.3
AABR07070559	32.1
AABR07070578	11.2
AABR07071244	10.9
AABR07071659	10
AABR07072853	9.5
AABR07072945	10
AABR07073038	10.6
AABR07073038	20.1
AABR07073381	20.6
Aacs	43.8
Aagab	12.6
Aak1	65
Aamp	13.2
Aar2	12
Aars	14
Aarsd1	21.5
Aasdh	16.3
Aatf	42.1
Aatk	10.6
Abat	12.3
Abca1	20.1
Abca2	10.6
Abca3	44.7
Abca5	16.9
Abcb10	15.2
Abcb4	14.9
Abcb7	18.1
Abcb8	19.8
Abcb9	23.2
Abcc1	26.4
Abcc3	55.3
Abcc4	27.5
Abcc5	51.9
Abcc8	87.4
Abcd3	58.5
Abcd4	12.3
Abce1	14.3
Abcf1	44.7
Abcf2	16.9
Abcf3	16.6
Abcg1	30.1
Abhd11	9.7
Abhd12	19.8
Abhd14b	8
Abhd15	16.9
Abhd16a	16.3
Abhd17a	6.9
Abhd17b	26.4
Abhd17c	22.6
Abhd18	21.8
Abhd2	51.3
Abhd3	18.3
Abhd6	32.1
Abhd8	14.6
Abi1	61.6
Abi2	30.4
Abl2	51
Ablim2	28.1
Ablim3	28.4
Abr	28.9
Abracl	11.5
Abraxas1	32.7
Abraxas2	9.7
AC094246	22.3
AC095390	30.1
AC095693	19.2
AC096473	21.2
AC097784	16.3
AC099449	16.9
AC105531	45.3
AC106225	12
AC106663	11.2
AC106932	16.9
AC110306	9.5
AC113756	17.5
AC115666	8.3
AC116071	12
AC118165	30.1
AC118439	28.1
AC118963	33.2
AC119332	7.7
AC119762	7.7
AC119762	14
AC120262	6.9
AC120486	13.8
AC123346	6.6
AC125757	8.9
AC125982	20.9
AC126572	16.9
AC128154	21.5
AC128303	9.7
AC128402	9.2
AC129824	12.3
AC130162	36.1
AC130970	25.5
AC131411	12.9
AC132057	9.7
AC133270	6.6
AC133673	10.9
AC134024	18.3
AC134224	88
AC134224	46.7
AC135142	6.3
AC139642	18.1
AC141169	10
AC141377	20.3
AC142126	19.2
Ac1576	11.2
AC239701	10.9
AC241873	37.2
Acaca	35.8
Acad10	20.6
Acad11	8.3
Acad8	28.7
Acadl	14.3
Acads	15.2
Acadsb	14
Acadvl	19.5
Acap2	53.6
Acat1	10.6
Acbd3	27.8
Acbd4	8.6
Acbd6	46.1
Ace3	9.2
Acer3	36.1
Ache	8
Acin1	50.4
Acly	80.8
Aco1	21.2
Aco2	49.6
Acot7	12.3
Acot8	15.5
Acot9	9.7
Acox1	22.3
Acp1	16.3
Acsl1	18.1
Acsl3	19.8
Acsl4	13.8
Acsl5	34.7
Acsl6	27.5
Acsm3	14.9
Acss2	24.4
Actb	28.7
Actl6a	13.5
Actl6b	22.3
Actn1	54.7
Actn4	60.5
Actr10	34.4
Actr1a	34.1
Actr1b	12.9
Actr2	58.5
Actr3	31.2
Actr5	21.8
Actr6	14
Actr8	31.2
Acvr1	12.9
Acvr1b	28.4
Acvr2a	24.6
Acyp2	17.2
Adal	12.3
Adam10	35.8
Adam17	16
Adam22	21.8
Adam23	32.7
Adam4	10
Adam9	38.7
Adamts10	13.2
Adamts17	25.2
Adamtsl4	8.6
Adap1	22.9
Adap2	20.3
Adar	38.7
Adarb1	14.3
Adat1	10
Adck1	12.3
Adck2	10.9
Adck5	20.3
Adcy2	24.6
Adcy6	29.2
Adcy8	14.9
Adcy9	77.4
Add1	52.4
Add3	43.6
Adgb	14.3
Adgra2	7.7
Adgra3	8
Adgrb2	9.2
Adgrb3	51
Adgrg1	16.9
Adgrg4	15.8
Adgrl1	22.1
Adgrl2	37.2
Adgrl3	61.3
Adgrv1	9.2
Adipor1	24.6
Adipor2	10
Adk	36.4
Adnp	65.9
Adnp2	16.9
Adpgk	14
Adprhl2	10.3
Adprm	8.3
Adrm1	8.6
Adsl	20.6
Adss	10.3
Aebp2	16
Aen	32.7
Afdn	81.7
Aff1	7.2
Aff2	35.5
Aff3	62.8
Aff4	79.7
Afg3l1	9.2
Afg3l2	66.8
Afmid	13.5
Aftph	40.4
Aga	14
Agap1	52.4
Agap3	54.4
Agbl3	20.3
Agbl4	12.6
Agbl5	11.2
Agfg1	46.1
Agfg2	32.4
Aggf1	24.4
Agk	22.3
Agl	12.6
Ago1	21.8
Ago2	31.2
Ago3	49.6
Ago4	22.3
Agpat1	7.2
Agpat3	19.8
Agpat4	69.1
Agpat5	28.1
Agps	34.4
Agt	14.6
Agtpbp1	36.1
Agxt2	9.2
Ahctf1	17.2
Ahcy	13.5
Ahcyl1	46.4
Ahcyl2	57.9
Ahdc1	39.5
Ahi1	54.2
Ahsa1	10.6
Ahsa2	20.6
Aifm1	24.6
Aifm2	11.2
Aig1	43.8
Aimp1	14.6
Ak2	20.3
Ak3	49.6
Ak4	6.6
Ak8	20.9
Akap1	12
Akap10	57.6
Akap11	35.5
Akap13	69.1
Akap17a	15.5
Akap17b	22.6
Akap5	9.2
Akap7	20.3
Akap8	25.2
Akap8l	33
Akap9	70.5
Akip1	16.3
Akirin1	25.2
Akirin2	17.8
Akr1a1	25.8
Akr1b1	8.6
Akr1c13	51
Akr1c19	70.8
Akt1	12
Akt1s1	10.3
Akt2	23.2
Akt3	68.5
Alcam	28.7
Aldh16a1	16.6
Aldh3a2	15.2
Aldh5a1	22.6
Aldh7a1	18.9
Aldoa	26.4
Alg1	7.7
Alg11	14
Alg12	17.2
Alg14	24.6
Alg5	10.6
Alg6	26.1
Alg8	20.6
Alg9	12.3
Alk	9.7
Alkbh1	38.1
Alkbh3	26.9
Alkbh5	32.4
Alkbh8	37.8
Alms1	74.5
Alpl	12.9
Als2	16.6
Ambp	50.1
Ambra1	57.9
Amd1	24.6
Amdhd2	14
Amfr	18.6
Amigo1	9.7
Amigo2	12.3
Ammecr1	27.2
Ammecr1l	21.2
Amn1	10
Ampd2	10.9
Amph	7.4
Amz2	20.6
Anapc1	40.1
Anapc10	10.9
Anapc11	17.2
Anapc13	10.6
Anapc16	14
Anapc2	13.8
Anapc4	38.7
Anapc5	57.6
Anapc7	14
Angel1	9.7
Angpt2	20.9
Angptl6	8.3
Angptl7	8.6
Ank2	19.2
Ank3	93.7
Ankfy1	59.3
Ankh	41.5
Ankib1	56.4
Ankle1	6.3
Ankle2	24.4
Ankmy2	12.3
Ankrd10	65.3
Ankrd11	64.2
Ankrd12	25.8
Ankrd13a	13.5
Ankrd13b	12.6
Ankrd13c	42.1
Ankrd13d	22.3
Ankrd16	20.1
Ankrd17	72.2
Ankrd26	18.9
Ankrd27	56.2
Ankrd28	52.1
Ankrd39	10.3
Ankrd40	16.9
Ankrd42	9.5
Ankrd44	56.4
Ankrd49	20.6
Ankrd50	11.7
Ankrd52	9.5
Ankrd54	27.5
Ankrd55	11.7
Ankrd61	18.3
Anks1a	45.8
Anks3	12.9
Anks6	8.6
Anln	7.4
Ano10	10.6
Ano3	13.2
Ano6	24.6
Ano8	9.7
Anp32b	18.9
Anp32e	14.9
Antkmt	24.9
Antxr2	10.9
Anxa11	31.2
Anxa4	37
Anxa5	10.3
Anxa6	19.2
Anxa7	7.4
Ap1ar	15.5
Ap1b1	24.4
Ap1g2	14
Ap1m1	18.6
Ap1m2	27.5
Ap1s1	50.1
Ap1s2	23.8
Ap1s2	82.2
Ap1s3	17.2
Ap2a1	49
Ap2a2	20.3
Ap2b1	29.5
Ap2m1	14.3
Ap2s1	16
Ap3b1	55.6
Ap3b2	46.4
Ap3d1	28.1
Ap3m1	25.8
Ap3m2	18.1
Ap3s1	42.1
Ap3s2	29.5
Ap4e1	30.1
Ap4m1	13.8
Ap4s1	11.2
Ap5m1	15.5
Apaf1	12
Apba1	43.6
Apba2	38.1
Apba3	8.3
Apbb1	33.5
Apbb3	10.6
Apc	41
Apeh	18.9
Apex2	20.3
Aph1b	17.2
Api5	20.9
Aplp1	16
Aplp2	28.4
Apoo	38.1
Apool	18.6
App	62.5
Appbp2	34.4
Appl1	41.5
Appl2	39
Aptx	11.2
Aqr	25.5
Araf	15.2
Arap1	10.6
Arap2	48.4
Arcn1	16.6
Arel1	26.4
Arf1	22.3
Arf4	56.2
Arf5	41
Arf6	7.4
Arfgap1	62.8
Arfgap2	19.5
Arfgap3	37.8
Arfgef1	73.6
Arfgef2	42.4
Arfgef3	47.6
Arfip1	25.8
Arfip2	18.1
Arg1	7.2
Arglu1	79.4
Arhgap1	20.9
Arhgap10	20.3
Arhgap12	14.6
Arhgap17	40.7
Arhgap18	13.8
Arhgap21	31.8
Arhgap22	42.1
Arhgap24	20.9
Arhgap26	60.7
Arhgap31	15.8
Arhgap32	75.1
Arhgap35	72.2
Arhgap39	35.8
Arhgap44	47.3
Arhgap45	18.1
Arhgap5	46.4
Arhgap8	19.8
Arhgdia	15.5
Arhgef1	20.3
Arhgef10l	26.4
Arhgef11	56.2
Arhgef12	36.1
Arhgef17	18.1
Arhgef18	21.5
Arhgef26	9.7
Arhgef28	19.2
Arhgef3	33.2
Arhgef37	15.8
Arhgef40	15.5
Arhgef5	11.7
Arhgef7	37.2
Arhgef9	33
Arid1a	49.3
Arid1b	67.9
Arid2	55.6
Arid3a	12.6
Arid3b	16.3
Arid4a	32.7
Arid5b	18.9
Arih1	66.8
Arih2	37.2
Arl1	7.4
Arl13b	38.7
Arl14ep	34.7
Arl15	69.1
Arl2	13.2
Arl2bp	13.8
Arl3	23.5
Arl5a	28.7
Arl5b	16.3
Arl6	19.5
Arl6ip4	14.6
Arl6ip5	15.5
Arl6ip6	24.1
Arl8a	13.8
Arl8b	26.4
Armc1	26.1
Armc10	11.7
Armc2	8.9
Armc6	19.2
Armc7	56.2
Armc8	20.6
Armc9	41.5
Armcx3	30.4
Armh1	53
Armh3	46.7
Arnt	36.1
Arnt2	42.4
Arntl	13.2
Arpc1a	39.8
Arpc1b	27.2
Arpc2	31.8
Arpc3	25.2
Arpc5	13.5
Arpc5l	16
Arpin	17.5
Arr3	21.2
Arrb1	19.2
Arrdc1	11.5
Arrdc3	8.3
Arsa	11.5
Arsb	61.3
Arse	14
Arsg	9.5
Arv1	25.5
Arvcf	12.9
Asah1	33.2
Asap1	77.4
Asap2	27.5
Asb13	17.8
Asb3	41
Asb4	11.2
Asb7	27.2
Asb8	47.6
Ascc1	34.4
Ascc2	18.3
Ascc3	72.2
Asf1a	24.4
Ash1l	88.8
Ash2l	36.7
Asic1	19.5
Asic2	42.7
Asmtl	12.3
Asns	24.9
Asph	25.8
Asphd1	14.6
Aspscr1	9.5
Ass1	20.9
Astn1	35
Asxl1	51
Asxl2	42.1
Asxl3	15.8
Atad1	50.1
Atad2	44.7
Atad2b	54.4
Atad3a	8.9
Atad5	27.5
Atat1	28.7
Ate1	66.8
Atf1	53
Atf2	47.3
Atf4	16.3
Atf5	24.9
Atf6	20.1
Atf6b	13.5
Atf7	83.1
Atf7ip	16.3
Atf7ip2	7.7
Atg10	31.2
Atg101	13.8
Atg12	17.5
Atg14	10.3
Atg16l1	10.9
Atg16l2	19.2
Atg2a	8.6
Atg2b	20.6
Atg3	21.5
Atg4b	8.3
Atg4c	15.2
Atg4d	29.8
Atg5	18.6
Atg7	16.3
Atg9a	12.9
Atl1	19.2
Atl2	44.4
Atl3	52.4
Atm	30.4
Atox1	12
Atp11a	36.1
Atp11b	35.2
Atp11c	22.1
Atp13a1	18.6
Atp13a2	10.6
Atp13a3	30.7
Atp1a1	34.4
Atp1b1	17.2
Atp1b3	10
Atp23	20.6
Atp2a2	47.6
Atp2a3	32.1
Atp2b1	82.2
Atp2b2	48.1
Atp2b3	10.6
Atp2b4	35.8
Atp2c1	14.3
Atp5f1a	15.5
Atp5f1b	28.9
Atp5f1c	66.5
Atp5f1d	13.8
Atp5f1e	15.5
Atp5if1	26.6
Atp5mc1	25.2
Atp5mc2	44.7
Atp5md	11.7
Atp5me	7.2
Atp5mf	10.6
Atp5mg	13.8
Atp5pd	27.5
Atp5pf	28.9
Atp5po	13.8
Atp6ap1	10.9
Atp6ap2	12.3
Atp6v0a1	83.4
Atp6v0a2	28.9
Atp6v0b	59.6
Atp6v0c	22.6
Atp6v0d1	23.2
Atp6v0e1	22.6
Atp6v0e2	9.5
Atp6v1a	20.9
Atp6v1b2	57
Atp6v1c1	50.4
Atp6v1d	14.6
Atp6v1e1	15.5
Atp6v1f	11.2
Atp6v1g1	8.3
Atp6v1h	38.7
Atp7a	18.1
Atp8a1	28.7
Atp8a2	30.4
Atp8b1	89.4
Atp8b5p	13.8
Atp9a	42.4
Atp9b	61.3
Atpaf1	17.5
Atpaf2	20.6
Atpsckmt	11.2
Atr	16.3
Atrn	52.1
Atrnl1	40.7
Atrx	68.2
Atxn1	83.4
Atxn10	46.4
Atxn2	37.5
Atxn2l	43.6
Atxn3	8.3
Atxn7	21.5
Atxn7l1	49.3
Atxn7l3b	45.3
Auh	8.6
Aurkaip1	43.3
Avl9	32.1
AY036118	78.8
AY1725814	89.1
AY172581	78.2
Azin1	30.7
Azin2	23.2
B3galnt1	10.3
B3galnt2	16.3
B3galt2	13.5
B3gat3	22.3
B3glct	13.8
B3gnt2	12.6
B3gnt3	14.3
B3gntl1	27.5
B4galnt4	13.5
B4galt1	16.3
B4galt4	12.3
B4galt5	22.9
B4galt6	50.1
B630019K06Rik	7.7
Babam1	11.2
Babam2	63.9
Bace1	14
Bace2	34.1
Bach2	10.3
Bag1	20.9
Bag3	11.5
Bag4	18.1
Bag6	11.7
Baiap2	41.3
Baiap2l1	29.5
Bak1	9.2
Bambi	8.6
Banp	47
Bap1	12
Barx2	11.5
Basp1	22.3
Bax	21.5
Baz1a	23.5
Baz1b	71.9
Baz2a	32.4
Baz2b	46.4
Bbof1	19.5
Bbs1	16
Bbs10	8.3
Bbs2	13.5
Bbs4	13.5
Bbs5	14.3
Bbs7	11.2
Bbs9	41.8
Bbx	38.7
Bcam	18.6
Bcap29	16.6
Bcap31	18.1
Bcas2	20.6
Bcat2	15.2
Bccip	15.8
Bcdin3d	33
Bckdha	11.2
Bckdhb	25.5
Bckdk	24.1
Bcl10	9.2
Bcl2	33.2
Bcl2l1	31.2
Bcl2l11	17.8
Bcl2l13	12.3
Bcl2l2	17.8
Bcl3	16.9
Bcl7a	13.2
Bcl7b	24.6
Bcl7c	12.6
Bcl9	12
Bclaf1	67.9
Bclaf3	30.7
Bcor	10.3
Bcorl1	9.5
Bcr	55.3
Bdh1	28.9
Bdp1	55.3
Becn1	53.9
Bend4	18.1
Bend6	16
Bend7	15.8
Best1	13.2
Bet1	12
Bex2	15.5
Bex3	22.3
Bex4	12.3
Bfar	26.9
Bhlhb9	13.2
Bhlhe40	16
Bicc1	33
Bicd1	29.5
Bicd2	20.1
Bicdl1	53.6
Bicdl2	20.1
Bicra	24.6
Bicral	38.7
Bin1	74.8
Bin2	7.4
Birc2	14.6
Birc6	83.4
Bivm	16.9
Blcap	21.2
Blm	12
Blmh	57.9
Blnk	26.6
Bloc1s2	13.8
Bloc1s5	9.5
Bloc1s6	7.7
Blvrb	45.8
Bmp1	21.8
Bmp2k	20.6
Bmp6	12.3
Bmpr1a	31.8
Bmpr2	32.1
Bmt2	45.8
Bnip1	17.2
Bnip2	12.9
Bnip3	13.2
Bnip3l	16
Bod1l1	46.7
Bola2	8.3
Bola3	28.4
Borcs7	9.2
Borcs8	12.3
Bphl	15.8
Bptf	63.3
Braf	61
Brap	12.9
Brat1	11.7
Brca1	25.8
Brca2	16.3
Brcc3	9.5
Brd1	41.5
Brd3	20.9
Brd4	67.9
Brd7	25.2
Brd8	34.4
Brd9	38.4
Brf1	26.6
Brf2	17.2
Bri3	20.9
Bri3bp	14
Brinp1	14.9
Brinp2	11.7
Brip1	16.3
Brix1	15.5
Brk1	27.2
Brox	10
Brpf1	9.7
Brpf3	25.2
Brsk1	20.6
Brsk2	10.9
Brwd1	49
Brwd3	23.5
Bscl2	9.2
Bsdc1	24.6
Bsg	36.7
Bsn	28.9
Btaf1	43.8
Btbd1	47
Btbd10	28.4
Btbd11	31.5
Btbd19	10.6
Btbd2	10.9
Btbd3	18.3
Btbd7	35.2
Btbd9	66.8
Btd	13.2
Btf3	21.2
Btf3l4	16
Btg1	43.6
Btg2	40.1
Btg3	14.3
Btg3	28.9
Btrc	61.3
Bub1	7.4
Bub3	12.3
Bud23	7.7
Bud31	14.9
Bzw2	28.9
C1d	17.2
C1galt1	19.8
C1galt1c1	11.5
C1qtnf1	17.8
C2cd2	11.2
C2cd3	36.4
C2cd4b	8.9
C2cd5	35.5
C8g	10.3
C9	18.3
Ca11	20.3
Caap1	25.2
Cab39	44.7
Cab39l	16.6
Cabcoco1	38.4
Cabin1	26.1
Cables1	22.3
Cabp1	23.2
Cabp4	17.8
Cacfd1	12.9
Cachd1	8.9
Cacna1a	68.2
Cacna1b	25.8
Cacna1c	43.8
Cacna1d	55.9
Cacna1d	96
Cacna1g	8.3
Cacna1h	36.4
Cacna2d1	90.5
Cacna2d3	41.8
Cacnb2	80.5
Cacnb3	18.1
Cacng2	28.4
Cacng3	5.4
Cacng7	39
Cacng8	9.5
Cacul1	53.9
Cadm1	7.4
Cadm2	18.6
Cadps	57
Cadps2	86.2
Calm1	41.5
Calm2	13.8
Calml4	24.4
Calr	22.3
Calu	30.9
Camk1	15.2
Camk1d	32.4
Camk2b	67.3
Camk2d	54.4
Camk2g	14.6
Camk2n1	34.7
Camk4	61.3
Camkk2	32.1
Camkmt	10.9
Camlg	11.2
Camsap1	33
Camsap2	44.4
Camsap3	13.5
Camta1	49.6
Camta2	26.9
Cand1	34.4
Canx	45.8
Cap1	23.5
Capn15	24.6
Capn2	11.5
Capn5	13.8
Capn7	51.9
Caprin1	61.6
Capza1	31.8
Capza2	41.8
Capzb	29.8
Car10	53
Card19	15.5
Card6	7.4
Carhsp1	7.7
Carm1	40.4
Carmil1	56.4
Carnmt1	13.2
Cars	24.1
Cars2	18.9
Cartpt	38.1
Casc1	9.7
Casc3	37
Casc4	42.7
Casd1	9.5
Cask	57.3
Caskin1	13.2
Casp2	31.2
Casp3	20.3
Casp8ap2	51.6
Casp9	11.5
Cast	39.5
Castor2	39.5
Casz1	49.6
Cat	10.9
Catsperg	12.6
Cbarp	28.9
Cbfa2t2	79.9
Cbfa2t3	24.1
Cbfb	26.1
Cbl	26.4
Cblb	25.8
Cbll1	28.1
Cbr3	10.6
Cbr4	7.4
Cbwd1	26.6
Cbx1	30.7
Cbx3	54.7
Cbx5	40.1
Cbx6	33
Cbx7	8.9
Cc2d1a	15.8
Cc2d1b	17.2
Cc2d2a	31.8
Ccar1	24.6
Ccdc107	8.9
Ccdc112	28.9
Ccdc115	7.4
Ccdc117	31.8
Ccdc124	36.4
Ccdc125	11.5
Ccdc127	21.5
Ccdc130	9.5
Ccdc136	26.9
Ccdc137	17.2
Ccdc138	26.4
Ccdc14	10.6
Ccdc146	20.6
Ccdc149	26.9
Ccdc15	16.6
Ccdc150	13.8
Ccdc151	13.5
Ccdc159	9.2
Ccdc167	14.6
Ccdc174	28.7
Ccdc186	18.6
Ccdc187	8
Ccdc191	55.3
Ccdc25	9.5
Ccdc28b	20.1
Ccdc30	35.8
Ccdc34	16.6
Ccdc39	15.2
Ccdc47	51
Ccdc50	41.5
Ccdc57	33.8
Ccdc58	16
Ccdc59	22.6
Ccdc6	27.8
Ccdc62	53.9
Ccdc66	55
Ccdc71	7.7
Ccdc77	16.9
Ccdc82	24.4
Ccdc84	15.8
Ccdc85a	8.6
Ccdc86	8.6
Ccdc88a	63.6
Ccdc88c	21.2
Ccdc90b	7.2
Ccdc91	18.3
Ccdc92	20.3
Ccdc92b	29.8
Ccdc93	20.9
Ccdc97	7.4
Ccdc9b	10.9
Cchcr1	15.5
Ccm2	20.9
Ccnc	28.1
Ccne1	33.8
Ccne2	35.2
Ccnf	11.5
Ccng1	17.2
Ccnh	18.3
Ccni	33
Ccnk	19.2
Ccnt1	14.3
Ccnt2	56.7
Ccny	45
Ccnyl1	9.7
Ccp110	26.4
Ccpg1	11.5
Ccs	17.5
Ccser1	79.9
Ccser2	32.1
Cct2	13.8
Cct3	39.5
Cct4	55
Cct5	29.8
Cct6a	37.5
Cct7	17.2
Cct8	17.5
Ccz1b	31.2
Cd164	42.1
Cd200	65.6
Cd24	11.5
Cd274	10.9
Cd276	11.2
Cd2ap	52.1
Cd2bp2	14.6
Cd47	47
Cd55	8.9
Cd63	49
Cd79a	16.6
Cd81	23.8
Cd82	10.9
Cd99	23.8
Cdadc1	16.6
Cdan1	7.7
Cdc123	30.4
Cdc14a	46.7
Cdc14b	20.1
Cdc16	26.6
Cdc23	23.5
Cdc25a	11.7
Cdc25b	8
Cdc25c	10.3
Cdc26	10.6
Cdc27	40.4
Cdc37	24.6
Cdc37l1	53.9
Cdc40	14.6
Cdc42	68.5
Cdc42bpa	38.1
Cdc42bpb	53.3
Cdc42bpg	16.6
Cdc42ep3	36.7
Cdc42se2	40.4
Cdc45	16
Cdc5l	33.5
Cdc73	41
Cdca7l	10.9
Cdh1	29.2
Cdh11	7.7
Cdh2	51
Cdh22	10.9
Cdh23	11.2
Cdhr1	10
Cdhr5	33.8
Cdip1	28.9
Cdipt	11.2
Cdk1	10
Cdk10	58.2
Cdk11b	38.4
Cdk12	76.8
Cdk13	53.3
Cdk14	75.9
Cdk16	20.3
Cdk17	24.6
Cdk18	16.6
Cdk19	17.5
Cdk2ap1	12.3
Cdk4	21.2
Cdk5	20.9
Cdk5rap1	31.5
Cdk5rap3	12
Cdk6	9.7
Cdk7	16
Cdk9	10
Cdkal1	63.9
Cdkl2	15.2
Cdkn1a	8.9
Cdkn1b	23.2
Cdkn2a	10.9
Cdkn2aip	16.9
Cdkn2b	15.2
Cdon	64.2
Cdr2	8.6
Cdr2l	11.2
Cds1	11.2
Cds2	23.5
Cdv3	10.9
Cdx2	14.3
Cdyl	59.9
Ceacam1	16.6
Ceacam16	41.8
Cebpg	13.8
Cebpz	22.3
Cecr2	14.3
Celf1	45.8
Celf2	77.1
Celf3	47
Celf4	10.9
Celf5	16.6
Celf6	10.6
Celsr2	9.2
Celsr3	10.9
Cemip2	19.2
Cenpc	18.9
Cenpe	8.9
Cenpf	8.9
Cenph	12.6
Cenpj	9.7
Cenpk	14.3
Cenpn	10.6
Cenpp	6.6
Cenpv	30.9
Cep104	13.5
Cep112	31.2
Cep120	34.1
Cep126	17.5
Cep128	13.2
Cep131	15.8
Cep135	18.6
Cep162	17.5
Cep164	31.8
Cep170	11.5
Cep170b	41.8
Cep192	26.6
Cep250	27.8
Cep290	50.1
Cep295	29.5
Cep350	28.9
Cep41	11.7
Cep44	21.5
Cep57	52.4
Cep57l1	22.9
Cep63	17.5
Cep68	28.4
Cep70	22.1
Cep76	13.8
Cep78	18.6
Cep83	22.3
Cep85	23.8
Cep85l	42.1
Cep89	8.9
Cep95	24.6
Cep97	17.2
Cept1	32.4
Cerk	23.2
Cerkl	24.4
Cers2	11.5
Cers4	15.2
Cers5	35.2
Cers6	55.3
Cert1	50.7
Cetn2	12
Cfap20	13.8
Cfap298	11.2
Cfap36	35.2
Cfap410	8.9
Cfap69	19.8
Cfap77	15.2
Cfap97	34.1
Cfap99	17.2
Cfdp1	37.8
Cfl1	8.6
Cfl2	21.5
Cflar	10.3
Cggbp1	18.3
Cgrrf1	8.6
Chac2	22.3
Chaf1a	19.5
Chaf1b	11.5
Champ1	9.2
Chchd1	7.4
Chchd3	72.5
Chchd5	8.3
Chchd6	33.5
Chd1	44.7
Chd1l	10.9
Chd2	61
Chd3	19.2
Chd4	48.4
Chd5	11.7
Chd6	82.2
Chd7	37.5
Chd8	32.7
Chd9	42.1
Cherp	40.7
Chfr	24.4
Chga	91.7
Chgb	99.7
Chic1	28.4
Chic2	30.4
Chka	46.4
Chm	35
Chmp1a	9.2
Chmp2a	15.8
Chmp3	23.2
Chmp5	23.5
Chn1	16.9
Chn2	48.7
Chordc1	28.4
Chp1	19.5
Chpt1	34.4
Chrac1	26.4
Chrm5	13.2
Chrna7	7.7
Chst10	8.9
Chst11	27.5
Chst8	8.9
Chst9	6.9
Chsy1	13.2
Chsy3	18.3
Chtf8	11.7
Chtop	23.2
Chuk	31.8
Churc1	25.2
Ciao1	13.8
Ciao3	32.4
Cic	9.5
Cipc	24.6
Cisd1	40.4
Cisd2	22.3
Cit	10
Cited2	9.2
Ciz1	22.3
Ckap2	18.1
Ckap5	41.8
Ckb	13.2
Ckmt1	13.2
Clasp1	53.6
Clasp2	36.1
Clasrp	30.4
Clcc1	26.4
Clcn3	42.1
Clcn5	15.2
Clcn6	14
Clcn7	14
Clec16a	46.1
Clec2g	19.5
Clic1	35.5
Clic4	51.9
Clic5	39.3
Clint1	29.8
Clip1	64.2
Clip2	32.1
Clip4	18.9
Clk1	33.2
Clk3	10.9
Clk4	35.5
Clmn	8
Cln6	8.3
Clns1a	18.1
Clock	52.4
Clpb	28.4
Clpp	8.6
Clptm1	40.1
Clptm1l	10.6
Clpx	22.9
Clstn1	20.6
Clstn2	23.8
Clta	34.1
Cltb	21.5
Cltc	40.1
Clu	24.6
Cluap1	25.2
Cluh	20.1
Clybl	14
Cmas	13.8
Cmbl	21.8
Cmip	73.4
Cmpk1	28.1
Cmtm4	35.2
Cmtm8	10.3
Cmtr1	32.4
Cnbp	24.9
Cnep1r1	8.3
Cnga1	8.9
Cnih2	10.9
Cnih4	8.6
Cnksr2	13.5
Cnn3	32.7
Cnnm1	38.1
Cnnm2	16.9
Cnnm3	25.2
Cnnm4	9.7
Cnot1	33.8
Cnot10	20.9
Cnot11	10.3
Cnot2	51
Cnot3	15.5
Cnot4	63.6
Cnot6	37
Cnot6l	67.9
Cnot7	23.5
Cnot8	21.5
Cnot9	43.6
Cnpy2	30.4
Cnpy3	23.5
Cnrip1	8
Cnst	10.6
Cntfr	7.4
Cntln	10.3
Cntn1	20.3
Cntn3	16.6
Cntn4	16.6
Cntnap4	18.9
Cntnap5c	26.4
Cntrl	30.1
Cntrob	10
Coa5	9.5
Coa6	7.4
Coa7	8.6
Coasy	11.7
Cobl	53
Cobll1	29.2
Cog1	12.6
Cog2	16.6
Cog3	19.5
Cog4	35.2
Cog5	51.3
Cog6	15.2
Cog7	36.7
Cog8	9.7
Coil	23.2
Col11a1	15.5
Col16a1	10.3
Col18a1	8.6
Col24a1	10
Col27a1	54.2
Col6a6	10.6
Col9a1	10.3
Colgalt1	20.3
Commd1	33.8
Commd10	30.7
Commd3	29.8
Commd4	22.9
Commd7	15.2
Commd9	14.3
Comt	35
Cop1	38.1
Copa	32.1
Copb1	30.1
Cope	24.9
Copg2	44.7
Cops2	29.2
Cops3	50.1
Cops4	39.5
Cops5	24.4
Cops6	9.5
Cops7a	11.5
Cops8	8.9
Copz1	42.1
Coq10a	37
Coq10b	12.9
Coq3	12
Coq4	21.5
Coq5	14.6
Coq6	21.8
Coq8b	41
Coro1b	7.7
Coro1c	30.1
Coro2a	9.2
Coro2b	17.2
Cox10	19.5
Cox11	24.1
Cox14	11.2
Cox16	38.4
Cox17	14
Cox18	20.1
Cox19	13.5
Cox4i1	19.8
Cox5a	11.2
Cox5b	16
Cox6a1	17.8
Cox6c	29.2
Cox7a2l	19.2
Cox7a2l2	9.5
Cox7b	18.1
Cox7c	31.5
Cox8a	28.9
Cp	12.9
Cpd	39
Cpe	97.1
Cpeb1	25.2
Cpeb2	35.8
Cpeb3	30.4
Cpeb4	73.9
Cplane1	18.9
Cplx2	13.5
Cpn1	12.3
Cpne3	33
Cpne8	18.3
Cpox	8.6
Cpped1	16.6
Cpsf2	17.5
Cpsf3	18.3
Cpsf6	66.2
Cpsf7	35.8
Cpt1a	21.8
Cpt1c	24.9
Cr1l	10
Cradd	22.9
Cramp1	30.1
Crat	14.9
Crbn	18.1
Crcp	22.9
Creb1	23.2
Creb3	8.9
Creb3l1	24.9
Creb3l2	14.3
Crebbp	72.2
Crebl2	13.2
Crebrf	21.5
Crebzf	16
Creld1	10
Crem	17.2
Crim1	12
Crk	39.5
Crls1	9.5
Crmp1	29.5
Crnkl1	9.5
Crocc	15.5
Crppa	23.8
Crtc1	49.3
Crtc2	12.3
Crtc3	61.6
Cry2	35.5
Cryba1	17.2
Crybg3	22.6
Cryzl1	41.3
Cs	22.1
Csad	10
Csdc2	14.9
Csde1	25.8
Cse1l	22.6
Csk	14
Csmd2	61.6
Csnk1a1	80.8
Csnk1d	59.6
Csnk1e	13.5
Csnk1g1	38.7
Csnk1g2	30.4
Csnk1g3	43.6
Csnk2a1	63
Csnk2a2	27.5
Csnk2b	10
Cspp1	66.8
Csrp1	10.6
Csrp2	29.2
Cst3	11.2
Cst6	21.2
Cstf2	8
Cstf3	60.5
Ctbp1	29.2
Ctbp2	17.8
Ctbs	10.9
Ctc1	31.8
Ctcf	29.5
Ctdnep1	13.8
Ctdp1	15.2
Ctdsp1	11.5
Ctdsp2	15.5
Ctdspl	12
Ctdspl2	51.6
Ctif	19.5
Ctnna1	63.9
Ctnna2	11.7
Ctnnal1	27.5
Ctnnb1	8.9
Ctnnbip1	28.4
Ctnnbl1	48.4
Ctnnd1	37.5
Ctnnd2	86.5
Ctps1	26.1
Ctps2	26.9
Ctr9	39.5
Ctsa	9.2
Ctsb	10.3
Ctsl	8
Cuedc1	24.4
Cul1	57.3
Cul2	13.5
Cul3	42.1
Cul4a	59
Cul4b	16.9
Cul5	33
Cul9	21.5
Cuta	13.8
Cutc	13.8
Cux1	81.1
Cwc15	24.1
Cwc25	17.2
Cwc27	35
Cwf19l1	11.5
Cwf19l2	40.4
Cxadr	31.5
Cxxc1	7.7
Cxxc4	35.2
Cxxc5	12.3
Cyb561	11.7
Cyb561d1	8
Cyb5a	9.7
Cyb5b	37.8
Cyb5d2	11.5
Cyb5r1	10.9
Cyb5r4	19.2
Cyc1	19.5
Cyfip1	34.1
Cyfip2	43
Cyhr1	11.2
Cyld	24.4
Cyp20a1	20.9
Cyp2c6v1	20.6
Cyp46a1	14.9
Cyp4f17	7.7
Cystm1	40.1
Cyth1	21.8
Cyth2	13.2
Cyth3	16
Daam1	27.2
Dab1	12
Dab2ip	44.1
Dach1	48.7
Dad1	10.6
Dagla	25.8
Daglb	23.2
Dalrd3	8
Dap	35.2
Dap3	22.9
Dapk1	26.1
Dapk3	8.3
Dars	42.4
Daxx	16.3
Dazap1	26.1
Dazap2	31.5
Dbi	17.2
Dbndd2	8.3
Dbnl	34.7
Dbp	14.6
Dbt	9.2
Dcaf1	24.1
Dcaf10	52.4
Dcaf11	24.4
Dcaf13	24.4
Dcaf17	14.6
Dcaf5	43.3
Dcaf6	44.1
Dcaf7	24.1
Dcaf8	23.8
Dcakd	30.9
Dcbld1	41
Dcbld2	14.9
Dck	15.2
Dclk1	32.4
Dclk2	52.7
Dclre1a	52.7
Dclre1b	8
Dclre1c	11.5
Dcp1a	65.6
Dcps	44.7
Dctd	22.3
Dctn1	25.2
Dctn2	29.8
Dctn3	14.3
Dctn4	39.5
Dctn5	20.1
Dctn6	12.6
Dcun1d1	17.5
Dcun1d3	26.4
Dcun1d4	27.8
Dcun1d5	24.4
Dda1	10.3
Ddah1	9.7
Ddb1	33.8
Ddc	85.7
Ddhd1	20.9
Ddhd2	47.6
Ddi2	22.9
Ddit3	27.8
Ddost	19.5
Ddr1	9.7
Ddrgk1	31.2
Ddx1	35.2
Ddx10	19.8
Ddx17	69.9
Ddx18	25.2
Ddx19b	18.3
Ddx20	8
Ddx21	16.6
Ddx23	28.4
Ddx24	53.3
Ddx27	16.9
Ddx3	47.6
Ddx31	67
Ddx39a	11.2
Ddx39b	66.5
Ddx3x	23.8
Ddx41	17.5
Ddx42	60.7
Ddx46	44.1
Ddx47	9.7
Ddx5	81.7
Ddx50	69.9
Ddx52	14.9
Ddx54	11.2
Ddx55	11.7
Ddx6	31.2
Deaf1	31.8
Decr1	18.6
Def8	12.9
Dek	44.4
Dele1	9.2
Dennd10	31.5
Dennd11	18.6
Dennd1a	92.6
Dennd1b	48.1
Dennd2b	26.1
Dennd3	24.4
Dennd4a	19.2
Dennd4b	12
Dennd4c	65.6
Dennd5a	38.7
Dennd6a	39.5
Dennd6b	18.3
Denr	31.2
Depdc1	6
Depdc5	39.8
Deptor	43.3
Dera	18.1
Derl1	23.2
Derl2	9.7
Desi1	62.5
Desi2	24.4
Dffa	9.7
Dgat1	15.5
Dgcr6	7.7
Dgcr8	18.6
Dgka	8
Dgkb	97.7
Dgkd	25.5
Dgke	79.1
Dgkh	22.9
Dgki	29.2
Dgkz	32.4
Dguok	47.9
Dhcr24	15.8
Dhdds	55
Dhdh	24.9
Dhfr	27.2
Dhrs1	10.6
Dhrs11	8.6
Dhrs7	12.3
Dhrs7b	27.8
Dhrsx	45.3
Dhx15	27.2
Dhx29	23.5
Dhx30	24.9
Dhx32	28.7
Dhx35	21.5
Dhx36	68.5
Dhx37	10
Dhx40	18.1
Dhx57	25.5
Dhx8	18.9
Dhx9	34.7
Diaph1	29.2
Diaph3	8
Dicer1	31.5
Dido1	38.7
Dimt1	18.9
Dip2a	21.5
Dip2b	59
Dip2c	27.2
Dis3	8.3
Dis3l	8.3
Dis3l2	35.2
Disp1	20.6
Disp2	69.9
Dixdc1	18.9
Dkc1	34.1
Dlat	14
Dlc1	75.9
Dld	33
Dlg1	63.3
Dlg2	45.3
Dlg3	12
Dlg4	34.7
Dlg5	30.7
Dlgap1	33.8
Dlgap3	16.6
Dlgap4	23.8
Dlgap5	6.3
Dlst	27.8
Dmac2	15.2
Dmd	16.6
Dmpk	12
Dmtf1	35.5
Dmxl1	70.8
Dmxl2	35.2
Dnaaf1	12.6
Dnaaf5	8.6
Dnah11	24.1
Dnah8	23.2
Dnah9	29.5
Dnai1	37.5
Dnaja1	48.4
Dnaja2	26.1
Dnaja3	35.8
Dnajb11	20.6
Dnajb12	8.9
Dnajb13	16
Dnajb14	25.5
Dnajb2	22.3
Dnajb4	30.1
[truncated: 6,203 more rows]
